# Supplementary material for: Quality measurement for cardiovascular diseases and cancer in hospital value-based healthcare: a systematic review of the literature
Source: Springer Nature journal article supplement (doi:10.1186/s12913-022-08347-x), 2022-08-01
Supplement: MOESM2 [file 23325476]

### Additional File

|                                                                    |                                                                                                                                                                                                                                                             |
|--------------------------------------------------------------------|-------------------------------------------------------------------------------------------------------------------------------------------------------------------------------------------------------------------------------------------------------------|
| <b>Article title:</b>                                              | Quality Measurement for Cardiovascular Diseases and Cancer in Hospital Value-Based Healthcare: A Systematic Review of the Literature.                                                                                                                       |
| <b>Author names:</b>                                               | Rawia Abdalla, Milena Pavlova, Mohammed Hussein, and Wim Groot.                                                                                                                                                                                             |
| <b>Affiliation and e-mail address of the corresponding author:</b> | Maastricht University, Department of Health Services Research, CAPHRI, Maastricht University Medical Center, Faculty of Health, Medicine and Life Sciences, Maastricht, Limburg, The Netherlands.<br>r.abdalla@maastrichtuniversity.nl<br>Rawia85@yahoo.com |
| <b>Caption:</b>                                                    | This file includes all search strategies in the databases.                                                                                                                                                                                                  |

## Additional File 2:

### ALL SEARCH STRATEGIES

CINAHL, PubMed, EMBASE, and Ovid MEDLINE

## Initial Search 09. January. 2021

### PubMed NCBI

Searched via PubMed - NCBI (<https://www.ncbi.nlm.nih.gov/pubmed/>).

Searched on 09 January 2021

Records retrieved: **1,315**

((("value-based"[All Fields] OR "pay for performance"[All Fields] OR "P4P"[All Fields] OR "reimbursement, incentive"[MeSH Terms] OR "reimbursement, incentive"[All Fields] OR "reimbursement"[All Fields] OR "payment"[All Fields] OR "value driven"[All Fields] OR "financial\* reward\*"[All Fields] OR "financial\* incentive\*"[All Fields]) AND ("hospitals"[MeSH Terms] OR "hospitals"[All Fields] OR "hospital"[All Fields] OR "center"[All Fields] OR "centre"[All Fields] OR "health facility"[All Fields] OR "health organization"[All Fields])) AND ("patient reported outcome measures"[MeSH Terms] OR "patient reported outcome measures"[All Fields] OR "patient reported outcome"[All Fields] OR "patient centered"[All Fields] OR "quality measurement"[All Fields] OR "performance measurement"[All Fields] OR "measurement of quality"[All Fields] OR "quality measures"[All Fields] OR "performance measures"[All Fields] OR "quality indicators"[All Fields] OR "performance indicators"[All Fields] OR "quality metrics"[All Fields] OR "performance metrics"[All Fields] OR "key performance indicators"[All Fields] OR "process measure\*"[All Fields] OR "process indicator"[All Fields] OR "process assessment, health care"[MeSH Terms] OR "process assessment, health care"[All Fields] OR "value measures"[All Fields] OR "value indicators"[All Fields] OR "value metrics"[All Fields] OR "quality rate"[All Fields] OR "performance rate"[All Fields] OR "quality rating"[All Fields] OR "performance rating"[All Fields] OR "total performance score"[All Fields] OR "clinical measure"[All Fields] OR "outcome measure"[All Fields] OR "clinical indicator"[All Fields] OR "outcome indicator"[All Fields] OR "clinical metric"[All Fields] OR "outcome metric"[All Fields] OR "patient reported measure"[All Fields] OR "clinical outcome"[All Fields] OR "outcome assessment, health care"[MeSH Terms] OR "outcome assessment, health care"[All Fields] OR "patient outcome assessment"[MeSH Terms] OR "patient outcome assessment"[All Fields])) AND ("cardiovascular diseases"[MeSH Terms] OR "cardiovascular diseases"[All Fields] OR "cardio\*"[All Fields] OR "heart"[All Fields] OR "neoplasms"[MeSH Terms] OR "cancer"[All Fields] OR "oncology"[All Fields] OR "oncology service, hospital"[MeSH Terms] OR "oncology service, hospital"[All Fields])) AND "loattrfull text"[sb] AND eng[la] AND ("2010/01/01"[PDAT] : "2021/01/09"[PDAT])

### Search Details

| Number | Query                                                       | Results      |
|--------|-------------------------------------------------------------|--------------|
| #72    | #71 AND "2010/01/01"[PDAT] : "2021/01/09"[PDAT]             | <b>1,315</b> |
| #71    | #70 AND eng[la]                                             | 1,590        |
| #70    | #69 AND "loattrfull text"[sb]                               | 1,609        |
| #69    | #11 AND #19 AND #58 AND #68                                 | 1,686        |
| #68    | #59 OR #60 OR #61 OR #62 OR #63 OR #64 OR #65 OR #66 OR #67 | 8,299,664    |
| #67    | "oncology service, hospital"[All Fields]                    | 1,480        |
| #66    | "oncology service, hospital"[MeSH Terms]                    | 1,466        |
| #65    | "oncology"[All Fields]                                      | 673,379      |
| #64    | "cancer"[All Fields]                                        | 2,391,210    |
| #63    | "neoplasms"[MeSH Terms]                                     | 3,389,178    |
| #62    | "heart"[All Fields]                                         | 1,459,503    |
| #61    | "cardio*"[All Fields]                                       | 2,656,355    |
| #60    | "cardiovascular diseases"[All Fields]                       | 211,793      |

|     |                                                                                                                                                                                                                                                                        |           |
|-----|------------------------------------------------------------------------------------------------------------------------------------------------------------------------------------------------------------------------------------------------------------------------|-----------|
| #59 | "cardiovascular diseases"[MeSH Terms]                                                                                                                                                                                                                                  | 2,416,462 |
| #58 | #20 OR #21 OR #22 OR #23 OR #24 OR #25 OR #26 OR #27 OR #28 OR #29 OR #30 OR #31 OR #32 OR #33 OR #34 OR #35 OR #36 OR #37 OR #38 OR #39 OR #40 OR #41 OR #42 OR #43 OR #44 OR #45 OR #46 OR #47 OR #48 OR #49 OR #50 OR #51 OR #52 OR #53 OR #54 OR #55 OR #56 OR #57 | 1,354,643 |
| #57 | "patient outcome assessment"[All Fields]                                                                                                                                                                                                                               | 5,416     |
| #56 | "patient outcome assessment"[MeSH Terms]                                                                                                                                                                                                                               | 12,427    |
| #55 | "outcome assessment, health care"[All Fields]                                                                                                                                                                                                                          | 74,681    |
| #54 | "outcome assessment, health care"[MeSH Terms]                                                                                                                                                                                                                          | 1,157,585 |
| #53 | "clinical outcome"[All Fields]                                                                                                                                                                                                                                         | 77,952    |
| #52 | "patient reported measure"[All Fields]                                                                                                                                                                                                                                 | 159       |
| #51 | "outcome metric"[All Fields]                                                                                                                                                                                                                                           | 124       |
| #50 | "clinical metric"[All Fields]                                                                                                                                                                                                                                          | 43        |
| #49 | "outcome indicator"[All Fields]                                                                                                                                                                                                                                        | 362       |
| #48 | "clinical indicator"[All Fields]                                                                                                                                                                                                                                       | 917       |
| #47 | "outcome measure"[All Fields]                                                                                                                                                                                                                                          | 63,900    |
| #46 | "clinical measure"[All Fields]                                                                                                                                                                                                                                         | 801       |
| #45 | "total performance score"[All Fields]                                                                                                                                                                                                                                  | 51        |
| #44 | "performance rating"[All Fields]                                                                                                                                                                                                                                       | 247       |
| #43 | "quality rating"[All Fields]                                                                                                                                                                                                                                           | 730       |
| #42 | "performance rate"[All Fields]                                                                                                                                                                                                                                         | 207       |
| #41 | "quality rate"[All Fields]                                                                                                                                                                                                                                             | 47        |
| #40 | "value metrics"[All Fields]                                                                                                                                                                                                                                            | 41        |
| #39 | "value indicators"[All Fields]                                                                                                                                                                                                                                         | 19        |
| #38 | "value measures"[All Fields]                                                                                                                                                                                                                                           | 74        |
| #37 | "process assessment, health care"[All Fields]                                                                                                                                                                                                                          | 32,389    |
| #36 | "process assessment, health care"[MeSH Terms]                                                                                                                                                                                                                          | 4,784     |
| #35 | "process indicator"[All Fields]                                                                                                                                                                                                                                        | 115       |
| #34 | "process measure*"[All Fields]                                                                                                                                                                                                                                         | 2,507     |
| #33 | "key performance indicators"[All Fields]                                                                                                                                                                                                                               | 721       |
| #32 | "performance metrics"[All Fields]                                                                                                                                                                                                                                      | 2,529     |
| #31 | "quality metrics"[All Fields]                                                                                                                                                                                                                                          | 2,176     |
| #30 | "performance indicators"[All Fields]                                                                                                                                                                                                                                   | 3,427     |
| #29 | "quality indicators"[All Fields]                                                                                                                                                                                                                                       | 20,487    |
| #28 | "performance measures"[All Fields]                                                                                                                                                                                                                                     | 7,404     |
| #27 | "quality measures"[All Fields]                                                                                                                                                                                                                                         | 4,569     |
| #26 | "measurement of quality"[All Fields]                                                                                                                                                                                                                                   | 686       |
| #25 | "performance measurement"[All Fields]                                                                                                                                                                                                                                  | 1,676     |
| #24 | "quality measurement"[All Fields]                                                                                                                                                                                                                                      | 1,950     |
| #23 | "patient centered"[All Fields]                                                                                                                                                                                                                                         | 33,256    |
| #22 | "patient reported outcome"[All Fields]                                                                                                                                                                                                                                 | 14,401    |
| #21 | "patient reported outcome measures"[All Fields]                                                                                                                                                                                                                        | 10,542    |
| #20 | "patient reported outcome measures"[MeSH Terms]                                                                                                                                                                                                                        | 6,974     |
| #19 | #12 OR #13 OR #14 OR #15 OR #16 OR #17 OR #18                                                                                                                                                                                                                          | 9,131,902 |
| #18 | "centre"[All Fields]                                                                                                                                                                                                                                                   | 1,473,063 |
| #17 | "center"[All Fields]                                                                                                                                                                                                                                                   | 3,907,180 |
| #16 | "health organization"[All Fields]                                                                                                                                                                                                                                      | 103,662   |

|     |                                                           |           |
|-----|-----------------------------------------------------------|-----------|
| #15 | "health facility"[All Fields]                             | 27,447    |
| #14 | "hospital"[All Fields]                                    | 5,023,693 |
| #13 | "hospitals"[All Fields]                                   | 579,989   |
| #12 | "hospitals"[MeSH Terms]                                   | 278,634   |
| #11 | #1 OR #2 OR #3 OR #4 OR #5 OR #6 OR #7 OR #8 OR #9 OR #10 | 76,876    |
| #10 | "financial* incentive*"[All Fields]                       | 4,721     |
| #9  | "financial* reward*"[All Fields]                          | 516       |
| #8  | "value driven"[All Fields]                                | 744       |
| #7  | "payment"[All Fields]                                     | 28,563    |
| #6  | "reimbursement"[All Fields]                               | 45,300    |
| #5  | "reimbursement, incentive"[All Fields]                    | 4,456     |
| #4  | "reimbursement, incentive"[MeSH Terms]                    | 4,440     |
| #3  | "P4P"[All Fields]                                         | 523       |
| #2  | "pay for performance"[All Fields]                         | 2,118     |
| #1  | "value-based"[All Fields]                                 | 6,819     |

## EMBASE and Ovid MEDLINE(R)

Searched via **Ovid** (<http://ovidsp.ovid.com/>).

Date range searched: 2010 to current.

**Searched on 09 January 2021**

EMBASE Records retrieved: **249**

MEDLINE (R) Records retrieved: **95**

| Number | Searches                                                                            | EMBASE Results | MEDLINE Results |
|--------|-------------------------------------------------------------------------------------|----------------|-----------------|
| 1      | value-based.mp.                                                                     | 8176           | 5007            |
| 2      | exp reimbursement/                                                                  | 58164          | 0               |
| 3      | reimbursement.mp.                                                                   | 70061          | 40598           |
| 4      | (pay for performance or P4P).mp.                                                    | 2930           | 2068            |
| 5      | (Reimbursement adj2 incentive).mp.                                                  | 92             | 4487            |
| 6      | payment\$1.tw.                                                                      | 36528          | 25691           |
| 7      | value driven.mp.                                                                    | 435            | 271             |
| 8      | financial\$ reward\$.mp.                                                            | 754            | 527             |
| 9      | financial\$ incentive\$.mp.                                                         | 5822           | 4089            |
| 10     | or/1-9                                                                              | 110915         | 67218           |
| 11     | exp hospital/                                                                       | 1160533        | 278358          |
| 12     | hospital\$1.mp.                                                                     | 2366566        | 1291872         |
| 13     | healthcare organi#ation\$.tw.                                                       | 7361           | 5560            |
| 14     | health\$ institution\$.mp.                                                          | 7624           | 4676            |
| 15     | exp health care facility/                                                           | 1574703        | 0               |
| 16     | health\$ facilit\$.tw.                                                              | 25915          | 16096           |
| 17     | exp cancer center/                                                                  | 38027          | 0               |
| 18     | ((cancer or oncology) adj2 (center\$1 or centre\$1 or institut\$ or facilit\$)).tw. | 86413          | 38716           |

|    |                                                                                                                  |            |           |
|----|------------------------------------------------------------------------------------------------------------------|------------|-----------|
| 19 | ((cardiac or heart or cardio\$) adj2 (center\$1 or centre\$1 or institut\$ or facilit\$)).tw.                    | 19856      | 8739      |
| 20 | or/11-19                                                                                                         | 3027099    | 1360001   |
| 21 | exp patient-reported outcome/                                                                                    | 26784      | 6918      |
| 22 | patient reported outcome.mp.                                                                                     | 33489      | 11207     |
| 23 | patient reported outcome measures.mp.                                                                            | 6977       | 8829      |
| 24 | patient centered.mp.                                                                                             | 25108      | 28315     |
| 25 | (quality rating\$1 or quality indicator\$1 or quality measur\$ or quality metric\$1 or quality rate\$1).mp.      | 31278      | 28175     |
| 26 | (performance measure\$ or performance indicator\$1 or performance metric\$1 or performance rat\$3).mp.           | 29775      | 15473     |
| 27 | key performance indicators.mp.                                                                                   | 1339       | 519       |
| 28 | process assessment.mp.                                                                                           | 1117       | 32543     |
| 29 | process measure\$1.mp.                                                                                           | 3177       | 1855      |
| 30 | process indicators.mp.                                                                                           | 1105       | 726       |
| 31 | (value measur\$ or value indicator\$1 or value metric\$1).mp.                                                    | 2287       | 1344      |
| 32 | (clinical metric\$1 or clinical measur\$ or clinical indicator\$1).mp.                                           | 22722      | 12053     |
| 33 | exp outcome assessment/                                                                                          | 576114     | 0         |
| 34 | (outcome measur\$ or outcome indicator\$1 or outcome metric\$1 or outcome assessment or clinical outcome\$1).mp. | 1099168    | 415605    |
| 35 | (process measur\$ or process indicator\$1 or process metric\$1).mp.                                              | 4984       | 2930      |
| 36 | process assessment.mp.                                                                                           | 1117       | 32543     |
| 37 | process assessment, health care.mp.                                                                              | 430        | 32301     |
| 38 | patient reported measure\$1.mp.                                                                                  | 1140       | 542       |
| 39 | total performance score.mp.                                                                                      | 59         | 44        |
| 40 | patient outcome assessment.mp.                                                                                   | 988        | 5230      |
| 41 | or/21-40                                                                                                         | 1218967    | 516956    |
| 42 | exp cardiovascular disease/                                                                                      | 4161544    | 2414394   |
| 43 | cardiovascular diseases.mp.                                                                                      | 84286      | 179111    |
| 44 | cardio\$.mp.                                                                                                     | 1725975    | 887962    |
| 45 | heart/                                                                                                           | 323578     | 147787    |
| 46 | exp neoplasm/                                                                                                    | 4583128    | 3386512   |
| 47 | neoplasms.mp.                                                                                                    | 234703     | 2699661   |
| 48 | exp malignant neoplasm/                                                                                          | 3542517    | 3386512   |
| 49 | malignant neoplasm.mp.                                                                                           | 74419      | 4070      |
| 50 | cancer.mp.                                                                                                       | 3685371    | 1515370   |
| 51 | exp oncology/ or oncolog\$.mp. or oncology.mp.                                                                   | 414108     | 146332    |
| 52 | oncology service, hospital.mp.                                                                                   | 24         | 1473      |
| 53 | (oncology adj2 service\$1).mp.                                                                                   | 3504       | 2709      |
| 54 | or/42-53                                                                                                         | 9505287    | 6224028   |
| 55 | 10 and 20 and 41 and 54                                                                                          | 1776       | 536       |
| 56 | limit 55 to yr="2010 -Current"                                                                                   | 1578       | 379       |
| 57 | limit 56 to english language                                                                                     | 1566       | 370       |
| 58 | limit 57 to full text                                                                                            | <b>249</b> | <b>95</b> |

# EBSCO CINAHL

*Cumulative Index to Nursing and Allied Health Literature (CINAHL)*

Searched via EBSCOhost (www.ebscohost.com/).

**Searched on 09 January 2021**

Records retrieved: **368**

| Number | Query                                                                                                                                                                                                                                                                                                                | Results    |
|--------|----------------------------------------------------------------------------------------------------------------------------------------------------------------------------------------------------------------------------------------------------------------------------------------------------------------------|------------|
| S42    | S41 Narrow by Language: - english                                                                                                                                                                                                                                                                                    | <b>368</b> |
| S41    | S40 Limiters - Published Date: 01.01.2010 - 31.01.2021                                                                                                                                                                                                                                                               | 397        |
| S40    | S10 AND S18 AND S32 AND S39                                                                                                                                                                                                                                                                                          | 534        |
| S39    | S33 OR S34 OR S35 OR S36 OR S37 OR S38                                                                                                                                                                                                                                                                               | 1,445,275  |
| S38    | TX "neoplasm*" OR "oncology" OR "cancer" OR                                                                                                                                                                                                                                                                          | 631,382    |
| S37    | MH "oncology+"                                                                                                                                                                                                                                                                                                       | 11,218     |
| S36    | MH "neoplasms+"                                                                                                                                                                                                                                                                                                      | 558,539    |
| S35    | TI "cardi*" OR AB "cardi*" OR TI "heart" OR AB "heart"                                                                                                                                                                                                                                                               | 408,900    |
| S34    | TX "cardiovascular disease*"                                                                                                                                                                                                                                                                                         | 99,941     |
| S33    | MH "cardiovascular diseases*"                                                                                                                                                                                                                                                                                        | 598,405    |
| S32    | S19 OR S20 OR S21 OR S22 OR S23 OR S24 OR S25 OR S26 OR S27 OR S28 OR S29 OR S30 OR S31                                                                                                                                                                                                                              | 223,113    |
| S31    | TX "patient reported measure" OR "patient outcome assessment"                                                                                                                                                                                                                                                        | 16,103     |
| S30    | TX "outcome measur*" OR "outcome metric*" OR "outcome indicator*" OR "outcome assessment"                                                                                                                                                                                                                            | 133,728    |
| S29    | MH "patient-reported outcomes*"                                                                                                                                                                                                                                                                                      | 2,837      |
| S28    | MH "outcome assessment"                                                                                                                                                                                                                                                                                              | 44,531     |
| S27    | TX "clinical measur*" OR "clinical metric*" OR "clinical indicator*" OR "clinical outcome*"                                                                                                                                                                                                                          | 71,599     |
| S26    | MH "clinical indicators"                                                                                                                                                                                                                                                                                             | 12,543     |
| S25    | TX "value measur*" OR "value metric*" OR "value indicator*"                                                                                                                                                                                                                                                          | 272        |
| S24    | TX "process measur*" OR "process assessment" OR "process indicator*"                                                                                                                                                                                                                                                 | 6,415      |
| S23    | MH "process assessment (health care)+"                                                                                                                                                                                                                                                                               | 8,173      |
| S22    | TX "performance measur*" OR "performance metric*" OR "performance rat*" OR "performance indicator*" OR "total performance score"                                                                                                                                                                                     | 11,340     |
| S21    | TX "key performance indicators"                                                                                                                                                                                                                                                                                      | 410        |
| S20    | MH "performance measurement systems"                                                                                                                                                                                                                                                                                 | 2,263      |
| S19    | TX "quality measur*" OR "quality metric*" OR "quality rat*" OR "quality indicator*"                                                                                                                                                                                                                                  | 14,679     |
| S18    | S11 OR S12 OR S13 OR S14 OR S15 OR S16 OR S17                                                                                                                                                                                                                                                                        | 2,436,037  |
| S17    | TI ((cancer or oncology) N2 (center OR centers OR centre OR centres OR institute* OR facilit* OR "hospital unit*")) OR AB ((cancer or oncology) N2 (center OR centers OR centre OR centres OR institute* OR facilit* OR "hospital unit*"))                                                                           | 16,765     |
| S16    | (MH "Cancer Care Facilities")                                                                                                                                                                                                                                                                                        | 5,642      |
| S15    | TI ((cardiac or heart or cardio*) N2 (center OR centers OR centre OR centres OR institute* OR facilit* OR "hospital unit*")) OR AB ((cardiac or heart or cardio*) N2 (center OR centers OR centre OR centres OR institute* OR facilit* OR "hospital unit*")) OR TI "coronary care unit*" OR AB "coronary care unit*" | 4,106      |
| S14    | (MH "Academic Medical Centers")                                                                                                                                                                                                                                                                                      | 74,879     |
| S13    | TX "center" OR "centers" OR "centre" OR "centres"                                                                                                                                                                                                                                                                    | 1,271,749  |
| S12    | TX "hospital" OR "hospitals"                                                                                                                                                                                                                                                                                         | 1,594,487  |
| S11    | MH "Hospitals*"                                                                                                                                                                                                                                                                                                      | 118,672    |
| S10    | S1 OR S2 OR S3 OR S4 OR S5 OR S6 OR S7 OR S8 OR S9                                                                                                                                                                                                                                                                   | 63,594     |
| S9     | TX "financial* incentive*"                                                                                                                                                                                                                                                                                           | 2,876      |

|    |                                                                                                 |        |
|----|-------------------------------------------------------------------------------------------------|--------|
| S8 | TX "financial* reward*"                                                                         | 368    |
| S7 | TI "payment" OR AB "payment"                                                                    | 13,641 |
| S6 | TX reimbursement                                                                                | 47,458 |
| S5 | MH "Reimbursement, Incentive"                                                                   | 2,634  |
| S4 | TX "pay for performance" OR P4P                                                                 | 1,898  |
| S3 | TX "value-driven"                                                                               | 485    |
| S2 | (MH "Value-Based Health Care") OR (MH "Value-Based Insurance") OR (MH "Value-Based Purchasing") | 1,580  |
| S1 | TX value-based                                                                                  | 5,671  |

## Second Search 15. February. 2021

### PubMed NCBI

Searched via PubMed - NCBI (<https://www.ncbi.nlm.nih.gov/pubmed/>).

Searched on 15 February 2021... Records retrieved: **1,670**

((("value-based"[All Fields] OR "pay for performance"[All Fields] OR "P4P"[All Fields] OR "reimbursement, incentive"[MeSH Terms] OR "reimbursement, incentive"[All Fields] OR "reimbursement"[All Fields] OR "payment"[All Fields] OR "value driven"[All Fields] OR "financial\* reward\*"[All Fields] OR "financial\* incentive\*"[All Fields] OR "international consortium"[All Fields]) AND ("hospitals"[MeSH Terms] OR "hospitals"[All Fields] OR "hospital"[All Fields] OR "center"[All Fields] OR "centre"[All Fields] OR "health facility"[All Fields] OR "health organization"[All Fields])) AND ("patient reported outcome measures"[MeSH Terms] OR "patient reported outcome measures"[All Fields] OR "patient reported outcome"[All Fields] OR "quality measurement"[All Fields] OR "performance measurement"[All Fields] OR "measurement of quality"[All Fields] OR "quality measures"[All Fields] OR "performance measures"[All Fields] OR "quality indicators"[All Fields] OR "performance indicators"[All Fields] OR "quality metrics"[All Fields] OR "performance metrics"[All Fields] OR "key performance indicators"[All Fields] OR "process measure\*"[All Fields] OR "process indicator"[All Fields] OR "process assessment, health care"[MeSH Terms] OR "process assessment, health care"[All Fields] OR "value measures"[All Fields] OR "value indicators"[All Fields] OR "value metrics"[All Fields] OR "quality rate"[All Fields] OR "performance rate"[All Fields] OR "quality rating"[All Fields] OR "performance rating"[All Fields] OR "total performance score"[All Fields] OR "clinical measure"[All Fields] OR "outcome measure"[All Fields] OR "clinical indicator"[All Fields] OR "outcome indicator"[All Fields] OR "clinical metric"[All Fields] OR "outcome metric"[All Fields] OR "patient reported measure"[All Fields] OR "clinical outcome"[All Fields] OR "outcome assessment, health care"[MeSH Terms] OR "outcome assessment, health care"[All Fields] OR "patient outcome assessment"[MeSH Terms] OR "patient outcome assessment"[All Fields] OR "patient satisfaction"[MeSH Terms] OR "patient satisfaction"[All Fields] OR "patient preference"[MeSH Terms] OR "patient preference"[All Fields] OR "patient-centered care"[MeSH Terms] OR "patient-centered care"[All Fields] OR "patient participation"[MeSH Terms] OR "patient participation"[All Fields] OR "patient experience"[All Fields] OR "patient reported experience measures"[All Fields] OR "PREMs"[All Fields] OR "patient centeredness"[All Fields] OR "patient centered"[All Fields])) AND ("cardiovascular diseases"[MeSH Terms] OR "cardiovascular diseases"[All Fields] OR "cardio\*"[All Fields] OR "heart"[All Fields] OR "neoplasms"[MeSH Terms] OR "cancer"[All Fields] OR "oncology"[All Fields] OR "oncology service, hospital"[MeSH Terms] OR "oncology service, hospital"[All Fields])) AND "loattrfull text"[sb] AND eng[la] AND ("2010/01/01"[PDAT] : "2021/02/15"[PDAT])

### Search Details

| Number | Query                                                                                                                         | Results   |
|--------|-------------------------------------------------------------------------------------------------------------------------------|-----------|
| #85    | #84 AND "2010/01/01"[PDAT] : "2021/02/15"[PDAT]                                                                               | 1,670     |
| #84    | #83 AND eng[la]                                                                                                               | 1,987     |
| #83    | #82 AND "loattrfull text"[sb]                                                                                                 | 2,002     |
| #82    | #12 AND #20 AND #71 AND #81                                                                                                   | 2,107     |
| #81    | #72 OR #73 OR #74 OR #75 OR #76 OR #77 OR #78 OR #79 OR #80                                                                   | 8,388,885 |
| #80    | "oncology service, hospital"[All Fields]                                                                                      | 1,500     |
| #79    | "oncology service, hospital"[MeSH Terms]                                                                                      | 1,485     |
| #78    | "oncology"[All Fields]                                                                                                        | 664,815   |
| #77    | "cancer"[All Fields]                                                                                                          | 2,430,924 |
| #76    | "neoplasms"[MeSH Terms]                                                                                                       | 3,420,442 |
| #75    | "heart"[All Fields]                                                                                                           | 1,475,175 |
| #74    | "cardio*"[All Fields]                                                                                                         | 2,684,878 |
| #73    | "cardiovascular diseases"[All Fields]                                                                                         | 215,435   |
| #72    | "cardiovascular diseases"[MeSH Terms]                                                                                         | 2,455,154 |
| #71    | #21 OR #22 OR #23 OR #24 OR #25 OR #26 OR #27 OR #28 OR #29 OR #30 OR #31 OR #32 OR #33 OR #34 OR #35 OR #36 OR #37 OR #38 OR | 1,476,344 |



|     |                                                                                                                                                                                                                              |           |
|-----|------------------------------------------------------------------------------------------------------------------------------------------------------------------------------------------------------------------------------|-----------|
|     | #39 OR #40 OR #41 OR #42 OR #43 OR #44 OR #45 OR #46 OR #47 OR #48 OR #49 OR #50 OR #51 OR #52 OR #53 OR #54 OR #55 OR #56 OR #57 OR #58 OR #59 OR #60 OR #61 OR #62 OR #63 OR #64 OR #65 OR #66 OR #67 OR #68 OR #69 OR #70 |           |
| #70 | "patient centered"[All Fields]                                                                                                                                                                                               | 34,529    |
| #69 | "patient centeredness"[All Fields]                                                                                                                                                                                           | 1,122     |
| #68 | "PREMs"[All Fields]                                                                                                                                                                                                          | 146       |
| #67 | "patient reported experience measures"[All Fields]                                                                                                                                                                           | 126       |
| #66 | "patient experience"[All Fields]                                                                                                                                                                                             | 7,057     |
| #65 | "patient participation"[All Fields]                                                                                                                                                                                          | 28,460    |
| #64 | "patient participation"[MeSH Terms]                                                                                                                                                                                          | 26,727    |
| #63 | "patient-centered care"[All Fields]                                                                                                                                                                                          | 23,597    |
| #62 | "patient-centered care"[MeSH Terms]                                                                                                                                                                                          | 21,162    |
| #61 | "patient preference"[All Fields]                                                                                                                                                                                             | 13,090    |
| #60 | "patient preference"[MeSH Terms]                                                                                                                                                                                             | 9,126     |
| #59 | "patient satisfaction"[All Fields]                                                                                                                                                                                           | 103,244   |
| #58 | "patient satisfaction"[MeSH Terms]                                                                                                                                                                                           | 92,162    |
| #57 | "patient outcome assessment"[All Fields]                                                                                                                                                                                     | 5,525     |
| #56 | "patient outcome assessment"[MeSH Terms]                                                                                                                                                                                     | 13,211    |
| #55 | "outcome assessment, health care"[All Fields]                                                                                                                                                                                | 75,630    |
| #54 | "outcome assessment, health care"[MeSH Terms]                                                                                                                                                                                | 1,173,459 |
| #53 | "clinical outcome"[All Fields]                                                                                                                                                                                               | 79,149    |
| #52 | "patient reported measure"[All Fields]                                                                                                                                                                                       | 165       |
| #51 | "outcome metric"[All Fields]                                                                                                                                                                                                 | 124       |
| #50 | "clinical metric"[All Fields]                                                                                                                                                                                                | 44        |
| #49 | "outcome indicator"[All Fields]                                                                                                                                                                                              | 369       |
| #48 | "clinical indicator"[All Fields]                                                                                                                                                                                             | 936       |
| #47 | "outcome measure"[All Fields]                                                                                                                                                                                                | 64,795    |
| #46 | "clinical measure"[All Fields]                                                                                                                                                                                               | 810       |
| #45 | "total performance score"[All Fields]                                                                                                                                                                                        | 52        |
| #44 | "performance rating"[All Fields]                                                                                                                                                                                             | 248       |
| #43 | "quality rating"[All Fields]                                                                                                                                                                                                 | 739       |
| #42 | "performance rate"[All Fields]                                                                                                                                                                                               | 208       |
| #41 | "quality rate"[All Fields]                                                                                                                                                                                                   | 49        |
| #40 | "value metrics"[All Fields]                                                                                                                                                                                                  | 42        |
| #39 | "value indicators"[All Fields]                                                                                                                                                                                               | 20        |
| #38 | "value measures"[All Fields]                                                                                                                                                                                                 | 74        |
| #37 | "process assessment, health care"[All Fields]                                                                                                                                                                                | 32,692    |
| #36 | "process assessment, health care"[MeSH Terms]                                                                                                                                                                                | 4,829     |
| #35 | "process indicator"[All Fields]                                                                                                                                                                                              | 115       |
| #34 | "process measure*"[All Fields]                                                                                                                                                                                               | 2,545     |
| #33 | "key performance indicators"[All Fields]                                                                                                                                                                                     | 755       |
| #32 | "performance metrics"[All Fields]                                                                                                                                                                                            | 2,615     |
| #31 | "quality metrics"[All Fields]                                                                                                                                                                                                | 2,251     |
| #30 | "performance indicators"[All Fields]                                                                                                                                                                                         | 3,523     |
| #29 | "quality indicators"[All Fields]                                                                                                                                                                                             | 20,753    |

|     |                                                                  |           |
|-----|------------------------------------------------------------------|-----------|
| #28 | "performance measures"[All Fields]                               | 7,669     |
| #27 | "quality measures"[All Fields]                                   | 4,673     |
| #26 | "measurement of quality"[All Fields]                             | 696       |
| #25 | "performance measurement"[All Fields]                            | 1,691     |
| #24 | "quality measurement"[All Fields]                                | 2,022     |
| #23 | "patient reported outcome"[All Fields]                           | 15,312    |
| #22 | "patient reported outcome measures"[All Fields]                  | 11,333    |
| #21 | "patient reported outcome measures"[MeSH Terms]                  | 7,587     |
| #20 | #13 OR #14 OR #15 OR #16 OR #17 OR #18 OR #19                    | 9,309,688 |
| #19 | "centre"[All Fields]                                             | 1,509,191 |
| #18 | "center"[All Fields]                                             | 3,998,666 |
| #17 | "health organization"[All Fields]                                | 106,333   |
| #16 | "health facility"[All Fields]                                    | 27,693    |
| #15 | "hospital"[All Fields]                                           | 5,125,107 |
| #14 | "hospitals"[All Fields]                                          | 589,586   |
| #13 | "hospitals"[MeSH Terms]                                          | 281,442   |
| #12 | #1 OR #2 OR #3 OR #4 OR #5 OR #6 OR #7 OR #8 OR #9 OR #10 OR #11 | 78,124    |
| #11 | "international consortium"[All Fields]                           | 1,436     |
| #10 | "financial* incentive*"[All Fields]                              | 4,887     |
| #9  | "financial* reward*"[All Fields]                                 | 541       |
| #8  | "value driven"[All Fields]                                       | 767       |
| #7  | "payment"[All Fields]                                            | 29,014    |
| #6  | "reimbursement"[All Fields]                                      | 45,802    |
| #5  | "reimbursement, incentive"[All Fields]                           | 4,486     |
| #4  | "reimbursement, incentive"[MeSH Terms]                           | 4,470     |
| #3  | "P4P"[All Fields]                                                | 531       |
| #2  | "pay for performance"[All Fields]                                | 2,151     |
| #1  | "value-based"[All Fields]                                        | 7,016     |

## EMBASE and Ovid MEDLINE(R)

Searched via **Ovid** (<http://ovidsp.ovid.com/>).

Date range searched: 2010 to current.

Searched on **15 February 2021**

EMBASE Records retrieved: **572**

MEDLINE (R) Records retrieved: **142**

| Number | Searches                                                                                                    | EMBASE Results | MEDLINE results |
|--------|-------------------------------------------------------------------------------------------------------------|----------------|-----------------|
| 1      | value-based.mp.                                                                                             | 8430           | 5171            |
| 2      | exp reimbursement/                                                                                          | 58918          | 0               |
| 3      | reimbursement.mp.                                                                                           | 71012          | 40934           |
| 4      | (pay for performance or P4P).mp.                                                                            | 2971           | 2079            |
| 5      | (Reimbursement adj2 incentive).mp.                                                                          | 92             | 4514            |
| 6      | payment\$1.tw.                                                                                              | 37235          | 25998           |
| 7      | value driven.mp.                                                                                            | 442            | 281             |
| 8      | financial\$ reward\$.mp.                                                                                    | 762            | 536             |
| 9      | financial\$ incentive\$.mp.                                                                                 | 5937           | 4140            |
| 10     | international consortium.mp.                                                                                | 1715           | 1006            |
| 11     | or/1-10                                                                                                     | 112758         | 67982           |
| 12     | exp hospital/                                                                                               | 1181692        | 281175          |
| 13     | hospital\$1.mp.                                                                                             | 2415735        | 1308634         |
| 14     | healthcare organi#ation\$.tw.                                                                               | 7524           | 5639            |
| 15     | health\$ institution\$.mp.                                                                                  | 7835           | 4795            |
| 16     | exp health care facility/                                                                                   | 1605002        | 0               |
| 17     | health\$ facilit\$.tw.                                                                                      | 26766          | 16622           |
| 18     | exp cancer center/                                                                                          | 38860          | 0               |
| 19     | ((cancer or oncology) adj2 (center\$1 or centre\$1 or institut\$ or facilit\$)).tw.                         | 88126          | 39297           |
| 20     | ((cardiac or heart or cardio\$) adj2 (center\$1 or centre\$1 or institut\$ or facilit\$)).tw.               | 20227          | 8889            |
| 21     | or/12-20                                                                                                    | 3090103        | 1378016         |
| 22     | exp patient-reported outcome/                                                                               | 28625          | 7522            |
| 23     | patient reported outcome.mp.                                                                                | 35341          | 11937           |
| 24     | patient reported outcome measures.mp.                                                                       | 7375           | 9492            |
| 25     | (quality rating\$1 or quality indicator\$1 or quality measur\$ or quality metric\$1 or quality rate\$1).mp. | 31903          | 28605           |
| 26     | (performance measure\$ or performance indicator\$1 or performance metric\$1 or performance rat\$3).mp.      | 30325          | 15777           |
| 27     | key performance indicators.mp.                                                                              | 1400           | 538             |
| 28     | process assessment.mp.                                                                                      | 1127           | 32864           |
| 29     | process measure\$1.mp.                                                                                      | 3235           | 1876            |
| 30     | process indicators.mp.                                                                                      | 1119           | 732             |
| 31     | (value measur\$ or value indicator\$1 or value metric\$1).mp.                                               | 2310           | 1354            |

|    |                                                                                                                  |            |            |
|----|------------------------------------------------------------------------------------------------------------------|------------|------------|
| 32 | (clinical metric\$1 or clinical measur\$ or clinical indicator\$1).mp.                                           | 23142      | 12246      |
| 33 | exp outcome assessment/                                                                                          | 589519     | 0          |
| 34 | (outcome measur\$ or outcome indicator\$1 or outcome metric\$1 or outcome assessment or clinical outcome\$1).mp. | 1121524    | 422658     |
| 35 | (process measur\$ or process indicator\$1 or process metric\$1).mp.                                              | 5066       | 2960       |
| 36 | process assessment.mp.                                                                                           | 1127       | 32864      |
| 37 | process assessment, health care.mp.                                                                              | 431        | 32615      |
| 38 | patient reported measure\$1.mp.                                                                                  | 1168       | 562        |
| 39 | total performance score.mp.                                                                                      | 59         | 44         |
| 40 | patient outcome assessment.mp.                                                                                   | 1001       | 5333       |
| 41 | exp patient satisfaction/                                                                                        | 144462     | 92037      |
| 42 | patient satisfaction.mp.                                                                                         | 154249     | 96126      |
| 43 | exp patient preference/                                                                                          | 20067      | 9095       |
| 44 | patient preference.mp.                                                                                           | 23699      | 12048      |
| 45 | "patient centered\$".mp.                                                                                         | 26726      | 29230      |
| 46 | exp patient participation/                                                                                       | 28746      | 26683      |
| 47 | patient participation.mp.                                                                                        | 30484      | 27783      |
| 48 | patient experience.mp.                                                                                           | 12221      | 4923       |
| 49 | patient reported experience measures.mp.                                                                         | 197        | 80         |
| 50 | PREMs.mp.                                                                                                        | 221        | 72         |
| 51 | or/22-50                                                                                                         | 1414432    | 634810     |
| 52 | exp cardiovascular disease/                                                                                      | 4221616    | 2434305    |
| 53 | cardiovascular diseases.mp.                                                                                      | 86033      | 181751     |
| 54 | cardio\$.mp.                                                                                                     | 1750818    | 898431     |
| 55 | heart/                                                                                                           | 324886     | 148399     |
| 56 | exp neoplasm/                                                                                                    | 4645097    | 3416393    |
| 57 | neoplasms.mp.                                                                                                    | 237524     | 2724802    |
| 58 | exp malignant neoplasm/                                                                                          | 3594121    | 3416393    |
| 59 | malignant neoplasm.mp.                                                                                           | 79077      | 4100       |
| 60 | cancer.mp.                                                                                                       | 3745258    | 1537295    |
| 61 | exp oncology/ or oncolog\$.mp. or oncology.mp.                                                                   | 420723     | 149192     |
| 62 | oncology service, hospital.mp.                                                                                   | 24         | 1494       |
| 63 | (oncology adj2 service\$1).mp.                                                                                   | 3626       | 2755       |
| 64 | or/52-63                                                                                                         | 9635580    | 6280246    |
| 65 | 11 and 21 and 51 and 64                                                                                          | 2078       | 599        |
| 66 | limit 65 to yr="2010 -Current"                                                                                   | 1835       | 420        |
| 67 | limit 66 to English language                                                                                     | 1821       | 409        |
| 68 | limit 67 to full text                                                                                            | <b>572</b> | <b>142</b> |

# EBSCO CINAHL

*Cumulative Index to Nursing and Allied Health Literature (CINAHL)*

Searched via EBSCOhost (www.ebscohost.com/).

**Searched on 15 February 2021.**

Records retrieved: **476**

| Number | Query                                                                                                                                                                                                                                            | Results    |
|--------|--------------------------------------------------------------------------------------------------------------------------------------------------------------------------------------------------------------------------------------------------|------------|
| S52    | S51 Limiters - Source Types: Academic Journals                                                                                                                                                                                                   | <b>476</b> |
| S51    | S50 Limiters - Language: English                                                                                                                                                                                                                 | 515        |
| S50    | S49 Limiters - Published Date: 01.01.2010 - 15.02.2021                                                                                                                                                                                           | 517        |
| S49    | S11 AND S19 AND S41 AND S48                                                                                                                                                                                                                      | 677        |
| S48    | S42 OR S43 OR S44 OR S45 OR S46 OR S47                                                                                                                                                                                                           | 1,465,881  |
| S47    | TX "neoplasm*" OR "oncology" OR "cancer" OR                                                                                                                                                                                                      | 641,845    |
| S46    | MH "oncology+"                                                                                                                                                                                                                                   | 11,374     |
| S45    | MH "neoplasms+"                                                                                                                                                                                                                                  | 567,356    |
| S44    | TI "cardi*" OR AB "cardi*" OR TI "heart" OR AB "heart"                                                                                                                                                                                           | 415,288    |
| S43    | TX "cardiovascular disease*"                                                                                                                                                                                                                     | 101,493    |
| S42    | MH "cardiovascular diseases+"                                                                                                                                                                                                                    | 605,454    |
| S41    | S20 OR S21 OR S22 OR S23 OR S24 OR S25 OR S26 OR S27 OR S28 OR S29 OR S30<br>OR S31 OR S32 OR S33 OR S34 OR S35 OR S36 OR S37 OR S38 OR S39 OR S40                                                                                               | 338,545    |
| S40    | TX "patient experience" OR TX "patient reported experience measures" OR TX "PREMs"                                                                                                                                                               | 5,223      |
| S39    | (MH "consumer participation") OR TX "consumer participation" OR TX "patient<br>participation"                                                                                                                                                    | 21,858     |
| S38    | TX "patient centeredness"                                                                                                                                                                                                                        | 704        |
| S37    | (MH "patient centered care") OR TX "patient-centered care"                                                                                                                                                                                       | 33,394     |
| S36    | (MH "patient preference") OR TX "patient preference"                                                                                                                                                                                             | 2,689      |
| S35    | TX "patient satisfaction"                                                                                                                                                                                                                        | 64,477     |
| S34    | (MH "patient satisfaction+")                                                                                                                                                                                                                     | 57,766     |
| S33    | TX "patient reported measure" OR "patient outcome assessment"                                                                                                                                                                                    | 16,324     |
| S32    | TX "outcome measur*" OR "outcome metric*" OR "outcome indicator*" OR "outcome<br>assessment"                                                                                                                                                     | 135,925    |
| S31    | TX "patient-reported outcomes"                                                                                                                                                                                                                   | 9,251      |
| S30    | MH "patient-reported outcomes+"                                                                                                                                                                                                                  | 3,089      |
| S29    | MH "outcome assessment"                                                                                                                                                                                                                          | 45,072     |
| S28    | TX "clinical measur*" OR "clinical metric*" OR "clinical indicator*" OR "clinical<br>outcome*"                                                                                                                                                   | 73,094     |
| S27    | MH "clinical indicators"                                                                                                                                                                                                                         | 12,663     |
| S26    | TX "value measur*" OR "value metric*" OR "value indicator*"                                                                                                                                                                                      | 275        |
| S25    | TX "process measur*" OR "process assessment" OR "process indicator*"                                                                                                                                                                             | 6,469      |
| S24    | MH "process assessment (health care)+"                                                                                                                                                                                                           | 8,217      |
| S23    | TX "performance measur*" OR "performance metric*" OR "performance rat*" OR<br>"performance indicator*" OR "total performance score"                                                                                                              | 11,483     |
| S22    | TX "key performance indicators"                                                                                                                                                                                                                  | 421        |
| S21    | MH "performance measurement systems"                                                                                                                                                                                                             | 2,270      |
| S20    | TX "quality measur*" OR "quality metric*" OR "quality rat*" OR "quality indicator*"                                                                                                                                                              | 14,863     |
| S19    | S12 OR S13 OR S14 OR S15 OR S16 OR S17 OR S18                                                                                                                                                                                                    | 2,482,761  |
| S18    | TI ((cancer or oncology) N2 (center OR centers OR centre OR centres OR institute* OR<br>facilit* OR "hospital unit*")) OR AB ((cancer or oncology) N2 (center OR centers OR<br>centre OR centres OR institute* OR facilit* OR "hospital unit*")) | 17,070     |
| S17    | (MH "Cancer Care Facilities")                                                                                                                                                                                                                    | 5,712      |

|     |                                                                                                                                                                                                                                                                                                                      |           |
|-----|----------------------------------------------------------------------------------------------------------------------------------------------------------------------------------------------------------------------------------------------------------------------------------------------------------------------|-----------|
| S16 | TI ((cardiac or heart or cardio*) N2 (center OR centers OR centre OR centres OR institute* OR facilit* OR "hospital unit*")) OR AB ((cardiac or heart or cardio*) N2 (center OR centers OR centre OR centres OR institute* OR facilit* OR "hospital unit*")) OR TI "coronary care unit*" OR AB "coronary care unit*" | 4,158     |
| S15 | (MH "Academic Medical Centers")                                                                                                                                                                                                                                                                                      | 75,682    |
| S14 | TX "center" OR "centers" OR "centre" OR "centres"                                                                                                                                                                                                                                                                    | 1,297,041 |
| S13 | TX "hospital" OR "hospitals"                                                                                                                                                                                                                                                                                         | 1,627,654 |
| S12 | MH "Hospitals+"                                                                                                                                                                                                                                                                                                      | 120,141   |
| S11 | S1 OR S2 OR S3 OR S4 OR S5 OR S6 OR S7 OR S8 OR S9 OR S10                                                                                                                                                                                                                                                            | 64,234    |
| S10 | TX "international consortium"                                                                                                                                                                                                                                                                                        | 953       |
| S9  | TX "financial* incentive*"                                                                                                                                                                                                                                                                                           | 2,916     |
| S8  | TX "financial* reward*"                                                                                                                                                                                                                                                                                              | 370       |
| S7  | TI "payment" OR AB "payment"                                                                                                                                                                                                                                                                                         | 13,802    |
| S6  | TX reimbursement                                                                                                                                                                                                                                                                                                     | 47,810    |
| S5  | MH "Reimbursement, Incentive"                                                                                                                                                                                                                                                                                        | 2,669     |
| S4  | TX "pay for performance" OR P4P                                                                                                                                                                                                                                                                                      | 1,908     |
| S3  | TX "value-driven"                                                                                                                                                                                                                                                                                                    | 506       |
| S2  | (MH "Value-Based Health Care") OR (MH "Value-Based Insurance") OR (MH "Value-Based Purchasing")                                                                                                                                                                                                                      | 1,630     |
| S1  | TX value-based                                                                                                                                                                                                                                                                                                       | 5,827     |

((TX value-based) OR ((MH "Value-Based Health Care") OR (MH "Value-Based Insurance") OR (MH "Value-Based Purchasing"))) OR (TX "value-driven") OR (TX "pay for performance" OR P4P) OR (MH "Reimbursement, Incentive") OR (TX reimbursement) OR (TI "payment" OR AB "payment") OR (TX "financial\* reward\*") OR (TX "international consortium") OR (TX "financial\* incentive\*") AND ((MH "Hospitals+") OR (TX "hospital" OR "hospitals") OR (TX "center" OR "centers" OR "centre" OR "centres") OR ((MH "Academic Medical Centers")) OR (TI ((cardiac OR heart OR cardio\*) N2 (center OR centers OR centre OR centres OR institute\* OR facilit\* OR "hospital unit\*")) OR AB ((cardiac OR heart OR cardio\*) N2 (center OR centers OR centre OR centres OR institute\* OR facilit\* OR "hospital unit\*")) OR TI "coronary care unit\*" OR AB "coronary care unit\*") OR ((MH "Cancer Care Facilities")) OR (TI ((cancer OR oncology) N2 (center OR centers OR centre OR centres OR institute\* OR facilit\* OR "hospital unit\*")) OR AB ((cancer OR oncology) N2 (center OR centers OR centre OR centres OR institute\* OR facilit\* OR "hospital unit\*")))) AND ((TX "quality measur\*" OR "quality metric\*" OR "quality rat\*" OR "quality indicator\*") OR (MH "performance measurement systems") OR (TX "key performance indicators") OR (TX "performance measur\*" OR "performance metric\*" OR "performance rat\*" OR "performance indicator\*" OR "total performance score") OR (MH "process assessment (health care)+") OR (TX "process measur\*" OR "process assessment" OR "process indicator\*") OR (TX "value measur\*" OR "value metric\*" OR "value indicator\*") OR (MH "clinical indicators") OR (TX "clinical measur\*" OR "clinical metric\*" OR "clinical indicator\*" OR "clinical outcome\*") OR (MH "outcome assessment") OR (MH "patient-reported outcomes+") OR (TX "patient-reported outcomes") OR (TX "outcome measur\*" OR "outcome metric\*" OR "outcome indicator\*" OR "outcome assessment") OR (TX "patient reported measure" OR "patient outcome assessment") OR ((MH "patient satisfaction+")) OR (TX "patient satisfaction") OR ((MH "patient preference") OR TX "patient preference") OR ((MH "patient centered care") OR TX "patient-centered care") OR (TX "patient centeredness") OR ((MH "consumer participation") OR TX "consumer participation" OR TX "patient participation") OR (TX "patient experience" OR TX "patient reported experience measures" OR TX "PREMs")) AND ((MH "cardiovascular diseases+") OR (TX "cardiovascular disease\*") OR (TI "cardi\*" OR AB "cardi\*" OR TI "heart" OR AB "heart") OR (MH "neoplasms+") OR (MH "oncology+") OR (TX "neoplasm\*" OR "oncology" OR "cancer" "OR"))
