# Supplementary material for: Quality measurement for cardiovascular diseases and cancer in hospital value-based healthcare: a systematic review of the literature
Source: Springer Nature journal article supplement (doi:10.1186/s12913-022-08347-x), 2022-08-01
Supplement: MOESM5 [file 23325476]

| <b>Additional File</b>                                             |                                                                                                                                                                                                                                                             |
|--------------------------------------------------------------------|-------------------------------------------------------------------------------------------------------------------------------------------------------------------------------------------------------------------------------------------------------------|
| <b>Article title:</b>                                              | Quality Measurement for Cardiovascular Diseases and Cancer in Hospital Value-Based Healthcare: A Systematic Review of the Literature                                                                                                                        |
| <b>Author names:</b>                                               | Rawia Abdalla, Milena Pavlova, Mohammed Hussein, and Wim Groot.                                                                                                                                                                                             |
| <b>Affiliation and e-mail address of the corresponding author:</b> | Maastricht University, Department of Health Services Research, CAPHRI, Maastricht University Medical Center, Faculty of Health, Medicine and Life Sciences, Maastricht, Limburg, The Netherlands.<br>r.abdalla@maastrichtuniversity.nl<br>Rawia85@yahoo.com |
| <b>Caption:</b>                                                    | This file includes a summary of quality measures reported in the studies.                                                                                                                                                                                   |

**Additional File 5**  
**Table 2: Summary of quality measures reported in the studies**

| Author, Year      | Condition/ Disease | Survival                                                                                                                                                                                                                                                                                     | Degree of Health or Recovery                                                                                                                                                                                                                                                                                   | Time to recovery & time to return to normal activities                                             | Disutility of care or treatment process                                                                                                | Sustainability of health or recovery                                                                                                                                                                                                                                                                  | Long-term consequences of therapy | Process Measures          |
|-------------------|--------------------|----------------------------------------------------------------------------------------------------------------------------------------------------------------------------------------------------------------------------------------------------------------------------------------------|----------------------------------------------------------------------------------------------------------------------------------------------------------------------------------------------------------------------------------------------------------------------------------------------------------------|----------------------------------------------------------------------------------------------------|----------------------------------------------------------------------------------------------------------------------------------------|-------------------------------------------------------------------------------------------------------------------------------------------------------------------------------------------------------------------------------------------------------------------------------------------------------|-----------------------------------|---------------------------|
| Zack [38] 2019    | Hypertension       | <ul style="list-style-type: none"> <li>Overall survival and cardiovascular survival † or ‡</li> </ul>                                                                                                                                                                                        | <ul style="list-style-type: none"> <li>QoL § <sup>a,b,c or d</sup></li> <li>Blood pressure control (&lt; 140/90 mm Hg) ‡</li> <li>Erectile dysfunction §</li> <li>Patient satisfaction §</li> <li>Health beliefs § <sup>e</sup></li> <li>Medication adherence § <sup>f</sup></li> <li>Pill burden §</li> </ul> | <ul style="list-style-type: none"> <li>Access to care §</li> <li>Access to medication §</li> </ul> | <ul style="list-style-type: none"> <li>Adverse events and side effects of medication ‡</li> </ul>                                      | <ul style="list-style-type: none"> <li>Ischemic heart disease ‡</li> <li>Cerebrovascular disease ‡</li> <li>Atrial fibrillation ‡</li> <li>Heart failure ‡</li> <li>Peripheral artery disease ‡</li> <li>Chronic renal disease ‡</li> <li>Hypertensive urgency or hypertensive emergency ‡</li> </ul> | Not reported in the study         | Not reported in the study |
| Veghel [39] 2016  | Cardiovascular     | <ul style="list-style-type: none"> <li>Risk-adjusted 120-day mortality for all so-called consolidated AVD ‡</li> <li>Risk-adjusted 120-day mortality after CABG ‡</li> <li>Risk-adjusted 1-year mortality after PCI ‡</li> <li>Risk-adjusted long-term survival rates after AVR ‡</li> </ul> | <ul style="list-style-type: none"> <li>QoL § <sup>c or g</sup></li> </ul>                                                                                                                                                                                                                                      | Not reported in the study                                                                          | <ul style="list-style-type: none"> <li>Risk-adjusted implantations of a new permanent pacemaker within 30 days after TAVI ‡</li> </ul> | <ul style="list-style-type: none"> <li>Risk-adjusted readmission due to myocardial infarction within 30-day for consolidated CAD ‡</li> <li>Risk-adjusted target vessel revascularization rate within 1 year of PCI ‡</li> </ul>                                                                      | Not reported in the study         | Not reported in the study |
| Salinas [41] 2016 | Stroke             | <ul style="list-style-type: none"> <li>All-cause mortality †</li> </ul>                                                                                                                                                                                                                      | <ul style="list-style-type: none"> <li>QoL § <sup>b</sup></li> <li>Mobility; Self-care &amp; grooming; Feeding; Ability to communicate §</li> <li>Adherence to smoking cessation advice §</li> <li>Ability to return to usual activities ‡ &amp; § <sub>c or h</sub></li> </ul>                                | Not reported in the study                                                                          | <ul style="list-style-type: none"> <li>Acute complications (Symptomatic intracerebral hemorrhage after thrombolysis) ‡</li> </ul>      | <ul style="list-style-type: none"> <li>Recurrence of disease (stroke or Transient Ischemic Attack) ‡ or §</li> </ul>                                                                                                                                                                                  | Not reported in the study         | Not reported in the study |

| Author, Year                | Condition/ Disease                     | Survival                             | Degree of Health or Recovery                                                                                                                                                                                 | Time to recovery & time to return to normal activities | Disutility of care or treatment process                                                                                                                                                                                                                                                                                                                                                                                                                                                                                  | Sustainability of health or recovery | Long-term consequences of therapy | Process Measures                                                                                                                                                                                                           |
|-----------------------------|----------------------------------------|--------------------------------------|--------------------------------------------------------------------------------------------------------------------------------------------------------------------------------------------------------------|--------------------------------------------------------|--------------------------------------------------------------------------------------------------------------------------------------------------------------------------------------------------------------------------------------------------------------------------------------------------------------------------------------------------------------------------------------------------------------------------------------------------------------------------------------------------------------------------|--------------------------------------|-----------------------------------|----------------------------------------------------------------------------------------------------------------------------------------------------------------------------------------------------------------------------|
| <b>Rimmele [42] 2020</b>    | Stroke                                 | Not reported in the study            | QoL § <sup>b&amp;i</sup>                                                                                                                                                                                     | Not reported in the study                              | Not reported in the study                                                                                                                                                                                                                                                                                                                                                                                                                                                                                                | Not reported in the study            | Not reported in the study         | Not reported in the study                                                                                                                                                                                                  |
| <b>Osnabrugge [43] 2014</b> | Coronary Artery Bypass Grafting (CABG) | Risk-adjusted morbidity/ mortality ‡ | Not reported in the study                                                                                                                                                                                    | Not reported in the study                              | Risk-adjusted length of stay ‡                                                                                                                                                                                                                                                                                                                                                                                                                                                                                           | Not reported in the study            | Not reported in the study         | Not reported in the study                                                                                                                                                                                                  |
| <b>Neilson [44] 2019</b>    | Coronary Artery Disease                | Not reported in the study            | <ul style="list-style-type: none"> <li>▪ Improving QoL §</li> <li>▪ Improving function §</li> <li>▪ Reducing shortness of breath §</li> <li>▪ Reducing chest pain §</li> <li>▪ Reducing fatigue §</li> </ul> | Not reported in the study                              | <ul style="list-style-type: none"> <li>▪ Preventing heart attacks ‡</li> <li>▪ Preventing need for a repeat heart procedure ‡</li> <li>▪ Preventing death ‡</li> <li>▪ Preventing stroke or mini-stroke ‡</li> <li>▪ Preventing heart failure from heart disease ‡</li> <li>▪ Reducing medication complications like major bleeding ‡</li> <li>▪ Preventing stent blockage ‡</li> <li>▪ Preventing heart medication switches because of failure of treatment, side effects or other issues with medications ‡</li> </ul> | Not reported in the study            | Not reported in the study         | Not reported in the study                                                                                                                                                                                                  |
| <b>Kinnier [45] 2016</b>    | Venous Thromboembolism (VTE)           | Not reported in the study            | Not reported in the study                                                                                                                                                                                    | Not reported in the study                              | <ul style="list-style-type: none"> <li>▪ VTE Rate ‡</li> </ul>                                                                                                                                                                                                                                                                                                                                                                                                                                                           | Not reported in the study            | Not reported in the study         | A composite VTE prophylaxis measure that requires daily ambulation, mechanical prophylaxis using continuous sequential compression devices, and properly timed and dosed chemoprophylaxis throughout the hospitalization ‡ |

| Author, Year            | Condition/ Disease                                                      | Survival                                                                                                                                                                                                                            | Degree of Health or Recovery                                                                                                                                                                      | Time to recovery & time to return to normal activities | Disutility of care or treatment process                                                                                                                                                                                                                        | Sustainability of health or recovery                                                                                                                                                                                                                                                                                                                     | Long-term consequences of therapy | Process Measures                                                                                                                                                                                                                                                                                           |
|-------------------------|-------------------------------------------------------------------------|-------------------------------------------------------------------------------------------------------------------------------------------------------------------------------------------------------------------------------------|---------------------------------------------------------------------------------------------------------------------------------------------------------------------------------------------------|--------------------------------------------------------|----------------------------------------------------------------------------------------------------------------------------------------------------------------------------------------------------------------------------------------------------------------|----------------------------------------------------------------------------------------------------------------------------------------------------------------------------------------------------------------------------------------------------------------------------------------------------------------------------------------------------------|-----------------------------------|------------------------------------------------------------------------------------------------------------------------------------------------------------------------------------------------------------------------------------------------------------------------------------------------------------|
| <b>MORSS [48] 2016</b>  | Heart failure                                                           | <ul style="list-style-type: none"> <li>30-day heart failure mortality ‡</li> </ul>                                                                                                                                                  | <ul style="list-style-type: none"> <li>Patient experience using both the Hospital Consumer Assessment of Healthcare Providers and Systems (HCAHPS) and Press Ganey Inpatient surveys §</li> </ul> | Not reported in the study                              | Not reported in the study                                                                                                                                                                                                                                      | <ul style="list-style-type: none"> <li>30-day heart failure readmissions ‡</li> </ul>                                                                                                                                                                                                                                                                    | Not reported in the study         | <ul style="list-style-type: none"> <li>Heart Failure Patients Given Discharge Instructions ‡</li> <li>Heart Failure Patients Given an Evaluation of Left Ventricular Systolic Function ‡</li> <li>Heart Failure Patients Given ACE Inhibitor or ARB for Left Ventricular Systolic Dysfunction ‡</li> </ul> |
| <b>Daeter [50] 2018</b> | Coronary Artery Disease                                                 | <ul style="list-style-type: none"> <li>Long-term survival (≤5 years) for CABG, PCI, and CT †</li> <li>1-year mortality for CABG, PCI, and CT †</li> <li>120-day mortality for CABG †</li> <li>30-day mortality for PCI †</li> </ul> | <ul style="list-style-type: none"> <li>QoL § <sup>c or g</sup></li> <li>Chest pain for CT §</li> </ul>                                                                                            | Not reported in the study                              | <ul style="list-style-type: none"> <li>Surgical reexploration (≤30 days) for CABG ‡</li> <li>Cerebrovascular accident (≤72 hours) for CABG ‡</li> <li>Deep sternal wound infection (≤30 days) for CABG ‡</li> <li>Urgent CABG (≤24 hours) for PCI ‡</li> </ul> | <ul style="list-style-type: none"> <li>Myocardial infarction (≤30 days) for CABG, PCI, and CT ‡</li> <li>Occurrence of target vessel revascularization (≤1 year) for PCI ‡</li> <li>Free of myocardial infarction for CABG ‡</li> <li>Free of coronary artery reintervention for CABG ‡</li> <li>Free of Major Adverse Cardiac Event for CT ‡</li> </ul> | Not reported in the study         | Not reported in the study                                                                                                                                                                                                                                                                                  |
| <b>Curcio [51] 2021</b> | Cardiac surgery                                                         | Not reported in the study                                                                                                                                                                                                           | <ul style="list-style-type: none"> <li>QoL § <sup>j</sup></li> </ul>                                                                                                                              | Not reported in the study                              | Not reported in the study                                                                                                                                                                                                                                      | Not reported in the study                                                                                                                                                                                                                                                                                                                                | Not reported in the study         | Not reported in the study                                                                                                                                                                                                                                                                                  |
| <b>Akmaz [54] 2019</b>  | Surgical Aortic Valve Replacement (SAVR) and Transcatheter Aortic Valve | <ul style="list-style-type: none"> <li>120-day mortality</li> <li>Long-term survival ≤ 1 year)</li> <li>Procedural mortality for TAVR</li> </ul>                                                                                    | <ul style="list-style-type: none"> <li>QoL §</li> <li>Mobilization</li> <li>New York Heart Association (NYHA) classification for TAVR</li> </ul>                                                  | Not reported in the study                              | <ul style="list-style-type: none"> <li>Cerebrovascular Accident</li> <li>Deep sternal wound Infection for SAVR</li> </ul>                                                                                                                                      | <ul style="list-style-type: none"> <li>Freedom of valve reintervention</li> </ul>                                                                                                                                                                                                                                                                        | Not reported in the study         | <ul style="list-style-type: none"> <li>Number of times that deficient information provision to SAVR patients causes negative outcomes</li> </ul>                                                                                                                                                           |

| Author, Year              | Condition/ Disease      | Survival                                                                                                                                                                                         | Degree of Health or Recovery                                                                                                                                                                              | Time to recovery & time to return to normal activities | Disutility of care or treatment process                                                                                                                                                                                                                                                                        | Sustainability of health or recovery | Long-term consequences of therapy | Process Measures                                                                                                                                                                                                                                                                                                                                                                                                                                                                                             |
|---------------------------|-------------------------|--------------------------------------------------------------------------------------------------------------------------------------------------------------------------------------------------|-----------------------------------------------------------------------------------------------------------------------------------------------------------------------------------------------------------|--------------------------------------------------------|----------------------------------------------------------------------------------------------------------------------------------------------------------------------------------------------------------------------------------------------------------------------------------------------------------------|--------------------------------------|-----------------------------------|--------------------------------------------------------------------------------------------------------------------------------------------------------------------------------------------------------------------------------------------------------------------------------------------------------------------------------------------------------------------------------------------------------------------------------------------------------------------------------------------------------------|
|                           | Replacement (TAVR)      | <ul style="list-style-type: none"> <li>30-day mortality for TAVR</li> </ul>                                                                                                                      |                                                                                                                                                                                                           |                                                        | <ul style="list-style-type: none"> <li>Implantation of new permanent pacemaker</li> <li>Vascular complications for TAVR</li> <li>Infections for SAVR including lung infections</li> <li>Re-sternotomy for SAVR</li> </ul>                                                                                      |                                      |                                   | <ul style="list-style-type: none"> <li>Type of SAVR / TAVR prosthesis</li> <li>Brand of TAVR prosthesis</li> <li>Number of times the frailty score of TAVR/SAVR patient &gt;75 years is measured</li> <li>Time between TAVR/SAVR surgery indication and surgery</li> <li>Number of times that anticoagulants are stopped within 3 days before surgery</li> <li>Time in hours between TAVR/SAVR surgery and permanent pacemaker implantation</li> <li>Percentage of standardized pain measurements</li> </ul> |
| <b>McNamara [55] 2015</b> | Coronary Artery Disease | <ul style="list-style-type: none"> <li>All-cause mortality for All patients with coronary artery disease †</li> <li>Mortality post-procedure and place of death (PCI and CABG) † or ‡</li> </ul> | <ul style="list-style-type: none"> <li>QoL § <sup>k&amp;l</sup></li> <li>Angina § <sup>m</sup></li> <li>Dyspnea § <sup>n</sup></li> <li>Depression § <sup>o</sup></li> <li>Functional status §</li> </ul> | Not reported in the study                              | <ul style="list-style-type: none"> <li>Admissions (for acute myocardial infarction, hemorrhagic stroke, ischemic stroke or heart failure) †</li> <li>Procedural interventions (PCI and /or CABG) †</li> <li>Acute renal failure †</li> <li>Acute complications of treatment (PCI &amp; CABG) † or ‡</li> </ul> | Not reported in the study            | Not reported in the study         | Not reported in the study                                                                                                                                                                                                                                                                                                                                                                                                                                                                                    |

| Author, Year             | Condition/ Disease      | Survival                                                                                                                                                                                                                                                                     | Degree of Health or Recovery                                                                                                                                                                                                                                                                                                                                         | Time to recovery & time to return to normal activities | Disutility of care or treatment process                                                                                                                                                                                                                     | Sustainability of health or recovery | Long-term consequences of therapy | Process Measures                                                                                                                                                                                                                                                               |
|--------------------------|-------------------------|------------------------------------------------------------------------------------------------------------------------------------------------------------------------------------------------------------------------------------------------------------------------------|----------------------------------------------------------------------------------------------------------------------------------------------------------------------------------------------------------------------------------------------------------------------------------------------------------------------------------------------------------------------|--------------------------------------------------------|-------------------------------------------------------------------------------------------------------------------------------------------------------------------------------------------------------------------------------------------------------------|--------------------------------------|-----------------------------------|--------------------------------------------------------------------------------------------------------------------------------------------------------------------------------------------------------------------------------------------------------------------------------|
|                          |                         |                                                                                                                                                                                                                                                                              |                                                                                                                                                                                                                                                                                                                                                                      |                                                        | <ul style="list-style-type: none"> <li>▪ Major surgery complications (CABG only) ‡</li> <li>▪ Interventional cardiology complications (PCI only) ‡</li> </ul>                                                                                               |                                      |                                   |                                                                                                                                                                                                                                                                                |
| <b>Burns [56] 2020</b>   | Heart Failure           | Mortality †                                                                                                                                                                                                                                                                  | <ul style="list-style-type: none"> <li>▪ QoL § <sup>b, o &amp; j</sup></li> <li>▪ Physical activity § <sup>p</sup></li> <li>▪ Financial burden §</li> </ul>                                                                                                                                                                                                          | Not reported in the study                              | <ul style="list-style-type: none"> <li>▪ Medication side effects ‡</li> <li>▪ Complications of treatment ‡ <sup>or</sup> §</li> <li>▪ Number of hospital appointments †</li> <li>▪ Number of hospital readmissions †</li> <li>▪ Length of stay †</li> </ul> | Not reported in the study            | Not reported in the study         | Not reported in the study                                                                                                                                                                                                                                                      |
| <b>Zerillo [57] 2017</b> | Colorectal Cancer (CRC) | <ul style="list-style-type: none"> <li>▪ Overall survival †</li> <li>▪ Cause of death (for all patients) †</li> <li>▪ Recurrence-free survival (for Patients with curative intent) ‡</li> <li>▪ Progression-free survival ( for Patients with advanced disease) ‡</li> </ul> | <ul style="list-style-type: none"> <li>▪ QoL § <sup>q, r, s &amp; t</sup></li> <li>▪ Pathological or clinical complete response (for patients with rectal cancer receiving neoadjuvant therapy) ‡</li> <li>▪ Margin status (for patients with rectal cancer receiving surgery) ‡</li> <li>▪ Quality of death for patients with advanced disease † &amp; ‡</li> </ul> | Not reported in the study                              | <ul style="list-style-type: none"> <li>▪ Short-term complications of treatment ‡</li> </ul>                                                                                                                                                                 | Not reported in the study            | Not reported in the study         | Not reported in the study                                                                                                                                                                                                                                                      |
| <b>Wang [58] 2016</b>    | Breast Cancer           | <ul style="list-style-type: none"> <li>▪ Event-free survival †</li> <li>▪ Overall survival rates †</li> </ul>                                                                                                                                                                | Not reported in the study                                                                                                                                                                                                                                                                                                                                            | Not reported in the study                              | Not reported in the study                                                                                                                                                                                                                                   | Not reported in the study            | Not reported in the study         | <ul style="list-style-type: none"> <li>▪ Cytologic or histologic confirmation before definitive surgery †</li> <li>▪ Patients with ductal carcinoma in situ do not undergo axillary node dissection †</li> <li>▪ Axillary node dissection with <math>\geq 10</math></li> </ul> |

| Author, Year            | Condition/ Disease | Survival                                      | Degree of Health or Recovery                                                                                                                                                                          | Time to recovery & time to return to normal activities | Disutility of care or treatment process                     | Sustainability of health or recovery               | Long-term consequences of therapy | Process Measures                                                                                                                                                                                                                                                                                                                                                           |
|-------------------------|--------------------|-----------------------------------------------|-------------------------------------------------------------------------------------------------------------------------------------------------------------------------------------------------------|--------------------------------------------------------|-------------------------------------------------------------|----------------------------------------------------|-----------------------------------|----------------------------------------------------------------------------------------------------------------------------------------------------------------------------------------------------------------------------------------------------------------------------------------------------------------------------------------------------------------------------|
|                         |                    |                                               |                                                                                                                                                                                                       |                                                        |                                                             |                                                    |                                   | axillary lymph nodes for patients with invasive cancer †<br>▪ Radiotherapy for invasive cancer after breast conservation surgery †<br>▪ Tumor size recorded †<br>▪ Adjuvant chemotherapy for patients 50 y or younger with positive axillary lymph nodes †<br>▪ Adjuvant chemotherapy or hormone therapy for patients older than 50 y with positive axillary lymph nodes † |
| <b>Egdom [59] 2019</b>  | Breast Cancer      | ▪ Mortality ‡<br>▪ Recurrence Free Survival ‡ | ▪ QoL § <sup>u,q,s,v,w,x &amp; y</sup><br>▪ QoL of carers <sup>z</sup>                                                                                                                                | Not reported in the study                              | ▪ Complications using Clavien-Dindo classification system ‡ | ▪ Number of reoperations due to positive margins ‡ | Not reported in the study         | Not reported in the study                                                                                                                                                                                                                                                                                                                                                  |
| <b>Stover [60] 2020</b> | Cancer             | Not reported in the study                     | ▪ QoL § (Toxicities; Symptom control; emotional distress; financial burden; Physical function; Patients' preferences for symptom management; Pain)<br>▪ Care experiences and satisfaction with care § | Not reported in the study                              | Not reported in the study                                   | Not reported in the study                          | Not reported in the study         | ▪ Care coordination<br>▪ Information provision that is understandable<br>▪ Communication<br>▪ Adherence to guideline-concordant care                                                                                                                                                                                                                                       |
| <b>Sohn [61] 2016</b>   | Prostate cancer    | Not reported in the study                     | ▪ QoL § <sup>aa</sup><br>▪ Patient satisfaction § <sup>bb</sup>                                                                                                                                       | Not reported in the study                              | ▪ Treatment-related complications ‡                         | Not reported in the study                          | Not reported in the study         | ▪ Avoidance of overuse of bone scan in men with low-risk tumors<br>▪ Androgen-Deprivation Therapy                                                                                                                                                                                                                                                                          |

| Author, Year             | Condition/ Disease | Survival                                                                                                                                                                                                                          | Degree of Health or Recovery                                                                                                                                                                                      | Time to recovery & time to return to normal activities                                                                                        | Disutility of care or treatment process                                                                                                                                                                                                                                          | Sustainability of health or recovery                                                 | Long-term consequences of therapy                                                                                                      | Process Measures                                                                                                                                                                                                                                                                                                                                                                                                                                                                 |
|--------------------------|--------------------|-----------------------------------------------------------------------------------------------------------------------------------------------------------------------------------------------------------------------------------|-------------------------------------------------------------------------------------------------------------------------------------------------------------------------------------------------------------------|-----------------------------------------------------------------------------------------------------------------------------------------------|----------------------------------------------------------------------------------------------------------------------------------------------------------------------------------------------------------------------------------------------------------------------------------|--------------------------------------------------------------------------------------|----------------------------------------------------------------------------------------------------------------------------------------|----------------------------------------------------------------------------------------------------------------------------------------------------------------------------------------------------------------------------------------------------------------------------------------------------------------------------------------------------------------------------------------------------------------------------------------------------------------------------------|
|                          |                    |                                                                                                                                                                                                                                   |                                                                                                                                                                                                                   |                                                                                                                                               |                                                                                                                                                                                                                                                                                  |                                                                                      |                                                                                                                                        | for high-risk patients undergoing radiation <ul style="list-style-type: none"> <li>▪ Documentation cT stage, biopsy Gleason in newly diagnosed</li> <li>▪ Documentation of digital rectal examination, cT stage, biopsy Gleason before primary therapy</li> <li>▪ Documentation of discussion of treatment options</li> <li>▪ Documentation of pathologic T and N stage, Gleason score, and margin status on pathology report in men undergoing radical prostatectomy</li> </ul> |
| <b>Nguyen [62] 2018</b>  | Lung cancer        | <ul style="list-style-type: none"> <li>▪ Survival ‡</li> <li>▪ Treatment-related Death ‡</li> </ul>                                                                                                                               | <ul style="list-style-type: none"> <li>▪ QoL §<sup>q</sup></li> <li>▪ Quality of death ‡</li> </ul>                                                                                                               | Not reported in the study                                                                                                                     | Not reported in the study                                                                                                                                                                                                                                                        | Not reported in the study                                                            | Not reported in the study                                                                                                              | Not reported in the study                                                                                                                                                                                                                                                                                                                                                                                                                                                        |
| <b>Martin [63] 2015</b>  | Prostate Cancer    | <ul style="list-style-type: none"> <li>▪ Overall survival †</li> <li>▪ Cause-specific survival †</li> <li>▪ Metastasis-free survival ‡<sup>or</sup> §</li> <li>▪ Biochemical recurrence-free survival ‡<sup>or</sup> §</li> </ul> | <ul style="list-style-type: none"> <li>▪ QoL §<sup>aa</sup></li> </ul>                                                                                                                                            | Not reported in the study                                                                                                                     | <ul style="list-style-type: none"> <li>▪ Acute complications for surgery patients using Clavien-Dindo classification ‡<sup>or</sup> §</li> <li>▪ Acute complications for radiation patients using the Common Terminology Criteria for Adverse Events ‡<sup>or</sup> §</li> </ul> | Not reported in the study                                                            | Not reported in the study                                                                                                              | Not reported in the study                                                                                                                                                                                                                                                                                                                                                                                                                                                        |
| <b>Lobatto [64] 2019</b> | Pituitary cancer   | Survival ‡                                                                                                                                                                                                                        | <ul style="list-style-type: none"> <li>▪ QoL §<sup>u &amp; g</sup></li> <li>▪ Endocrine remission §</li> <li>▪ Visual recovery §<sup>cc</sup></li> <li>▪ Recovery of pituitary function §<sup>dd</sup></li> </ul> | <ul style="list-style-type: none"> <li>▪ Time to recovery of visual function §<sup>cc</sup></li> <li>▪ Time to recovery of HRQoL §</li> </ul> | <ul style="list-style-type: none"> <li>▪ Length of hospital stay ‡</li> <li>▪ Nasal morbidity ‡</li> <li>▪ Complications ‡</li> </ul>                                                                                                                                            | <ul style="list-style-type: none"> <li>▪ Persistent disease Recurrences ‡</li> </ul> | <ul style="list-style-type: none"> <li>▪ New pituitary deficiencies ‡</li> <li>▪ Reoperation &gt;30 days and &lt;6 months ‡</li> </ul> | Not reported in the study                                                                                                                                                                                                                                                                                                                                                                                                                                                        |



| Author, Year           | Condition/ Disease | Survival                  | Degree of Health or Recovery                                              | Time to recovery & time to return to normal activities                       | Disutility of care or treatment process | Sustainability of health or recovery | Long-term consequences of therapy                                                                                                                                  | Process Measures                                                                                                                                                                                                                                                                                                                                                                                                                                                                                                                                                                                                                                                                                                                                                                             |
|------------------------|--------------------|---------------------------|---------------------------------------------------------------------------|------------------------------------------------------------------------------|-----------------------------------------|--------------------------------------|--------------------------------------------------------------------------------------------------------------------------------------------------------------------|----------------------------------------------------------------------------------------------------------------------------------------------------------------------------------------------------------------------------------------------------------------------------------------------------------------------------------------------------------------------------------------------------------------------------------------------------------------------------------------------------------------------------------------------------------------------------------------------------------------------------------------------------------------------------------------------------------------------------------------------------------------------------------------------|
|                        |                    |                           | <ul style="list-style-type: none"> <li>▪ Degree of resection §</li> </ul> | <ul style="list-style-type: none"> <li>▪ Time to return to work §</li> </ul> |                                         |                                      | <ul style="list-style-type: none"> <li>▪ Chronic supplementation of pituitary deficits ‡</li> <li>▪ Recurrence ‡</li> <li>▪ Persistent hormone excess ‡</li> </ul> |                                                                                                                                                                                                                                                                                                                                                                                                                                                                                                                                                                                                                                                                                                                                                                                              |
| <b>Liang [65] 2015</b> | Ovarian Cancer     | Not reported in the study | Not reported in the study                                                 | Not reported in the study                                                    | Not reported in the study               | Not reported in the study            | Not reported in the study                                                                                                                                          | <ul style="list-style-type: none"> <li>▪ Operative report with documentation of residual disease within 48 h of cytoreduction for women with invasive ovarian, fallopian tube, or peritoneal cancer ‡</li> <li>▪ Complete staging for women with invasive stages I–IIIB ovarian, fallopian tube, or peritoneal cancer who have undergone cytoreduction ‡</li> <li>▪ Intraperitoneal chemotherapy offered within 42 days of optimal cytoreduction to women with invasive stage III ovarian, fallopian tube, or peritoneal cancer ‡</li> <li>▪ Intraperitoneal chemotherapy administered within 42 days of optimal cytoreduction to women with invasive stage III ovarian, fallopian tube, or peritoneal cancer ‡</li> <li>▪ Platin or taxane administered within 42 days following</li> </ul> |

| Author, Year                  | Condition/ Disease | Survival                  | Degree of Health or Recovery | Time to recovery & time to return to normal activities | Disutility of care or treatment process                                                                                                   | Sustainability of health or recovery | Long-term consequences of therapy | Process Measures                                                                                                                                                                                                                                                                                                                                                                                                                                                                                                                                                                                                             |
|-------------------------------|--------------------|---------------------------|------------------------------|--------------------------------------------------------|-------------------------------------------------------------------------------------------------------------------------------------------|--------------------------------------|-----------------------------------|------------------------------------------------------------------------------------------------------------------------------------------------------------------------------------------------------------------------------------------------------------------------------------------------------------------------------------------------------------------------------------------------------------------------------------------------------------------------------------------------------------------------------------------------------------------------------------------------------------------------------|
|                               |                    |                           |                              |                                                        |                                                                                                                                           |                                      |                                   | cytoreduction to women with invasive stages I (grade 3), IC-IV ovarian, fallopian tube, or peritoneal cancer †<br>▪ Venous thromboembolism prophylaxis administered within 24 h of cytoreduction to women with invasive ovarian, fallopian tube, or peritoneal cancer †<br>▪ Order for prophylactic parenteral antibiotic administration within 1–2 h before cytoreduction for women with invasive ovarian, fallopian tube, or peritoneal cancer †<br>▪ Order for prophylactic parenteral antibiotic discontinuation within 24 h after cytoreduction for women with invasive ovarian, fallopian tube, or peritoneal cancer † |
| <b>Landercasper [66] 2018</b> | Breast cancer      | Not reported in the study | Not reported in the study    | Not reported in the study                              | ▪ Surgical site infection and cellulitis after breast and/or axillary surgery †<br>▪ Unplanned 30 day reoperation rate after mastectomy † | Not reported in the study            | Not reported in the study         | ▪ Preoperative diagnosis of breast cancer †<br>▪ Image confirmation of successful excision of image-localized breast lesion †                                                                                                                                                                                                                                                                                                                                                                                                                                                                                                |

| Author, Year                          | Condition/ Disease | Survival                                                                                                                                            | Degree of Health or Recovery                                                                                                                  | Time to recovery & time to return to normal activities                                                                      | Disutility of care or treatment process                                                                                                                                                            | Sustainability of health or recovery                                     | Long-term consequences of therapy                                                                                                                                                                                                                                                                                    | Process Measures                                                                                                                                                                                                                                                                                                                                                                                                                         |
|---------------------------------------|--------------------|-----------------------------------------------------------------------------------------------------------------------------------------------------|-----------------------------------------------------------------------------------------------------------------------------------------------|-----------------------------------------------------------------------------------------------------------------------------|----------------------------------------------------------------------------------------------------------------------------------------------------------------------------------------------------|--------------------------------------------------------------------------|----------------------------------------------------------------------------------------------------------------------------------------------------------------------------------------------------------------------------------------------------------------------------------------------------------------------|------------------------------------------------------------------------------------------------------------------------------------------------------------------------------------------------------------------------------------------------------------------------------------------------------------------------------------------------------------------------------------------------------------------------------------------|
|                                       |                    |                                                                                                                                                     |                                                                                                                                               |                                                                                                                             |                                                                                                                                                                                                    |                                                                          |                                                                                                                                                                                                                                                                                                                      | <ul style="list-style-type: none"> <li>▪ Sentinel lymph node biopsy for invasive breast cancer †</li> <li>▪ Surgeon assessment for hereditary cause of breast cancer †</li> <li>▪ Specimen orientation for partial mastectomy or excisional breast biopsy †</li> <li>▪ Selection of prophylactic antibiotics: first- or second-generation cephalosporin †</li> <li>▪ Discontinuation of prophylactic parenteral antibiotics †</li> </ul> |
| <b>Fayanju [67] 2016</b>              | Breast Cancer      | <ul style="list-style-type: none"> <li>▪ Overall survival †</li> <li>▪ Disease-free survival †</li> </ul>                                           | <ul style="list-style-type: none"> <li>▪ Return to normal activities of daily living §</li> <li>▪ Return to work status §</li> </ul>          | <ul style="list-style-type: none"> <li>▪ Access to care (≤ 10 days) †</li> <li>▪ Treatment delay (&gt;30 days) †</li> </ul> | <ul style="list-style-type: none"> <li>▪ Reoperation †</li> <li>▪ Treatment-related emergency department visits †</li> <li>▪ Readmission †</li> <li>▪ Infection requiring antibiotics †</li> </ul> | <ul style="list-style-type: none"> <li>▪ Recurrence † &amp; †</li> </ul> | <ul style="list-style-type: none"> <li>▪ Functional assessment of cancer therapy §<sup>ee</sup> (appearance satisfaction, patient-reported lymphedema, fatigue, physical intimacy, pain, physical well-being, social well-being, fertility preservation, cognitive dysfunction, neuropathy, osteoporosis)</li> </ul> | Not reported in the study                                                                                                                                                                                                                                                                                                                                                                                                                |
| <b>Cramer-van der Welle [68] 2021</b> | Lung cancer        | <ul style="list-style-type: none"> <li>▪ Overall survival after Diagnosis †</li> <li>▪ Overall mortality 1 and 2 years after diagnosis †</li> </ul> | <ul style="list-style-type: none"> <li>▪ QoL §<sup>q&amp;ff</sup></li> <li>▪ Treatment result after resection: Resection margins †</li> </ul> | Not reported in the study                                                                                                   | <ul style="list-style-type: none"> <li>▪ Complications after resection †</li> <li>▪ Side effects after radiotherapy or chemotherapy †</li> </ul>                                                   | Not reported in the study                                                | Not reported in the study                                                                                                                                                                                                                                                                                            | Not reported in the study                                                                                                                                                                                                                                                                                                                                                                                                                |

| Author, Year                        | Condition/ Disease      | Survival                                                                                                                                                    | Degree of Health or Recovery                                                                                                                                                                              | Time to recovery & time to return to normal activities                                                              | Disutility of care or treatment process                                                                                                                                   | Sustainability of health or recovery                                                                                                                                                                                          | Long-term consequences of therapy | Process Measures          |
|-------------------------------------|-------------------------|-------------------------------------------------------------------------------------------------------------------------------------------------------------|-----------------------------------------------------------------------------------------------------------------------------------------------------------------------------------------------------------|---------------------------------------------------------------------------------------------------------------------|---------------------------------------------------------------------------------------------------------------------------------------------------------------------------|-------------------------------------------------------------------------------------------------------------------------------------------------------------------------------------------------------------------------------|-----------------------------------|---------------------------|
|                                     |                         |                                                                                                                                                             | <ul style="list-style-type: none"> <li>Treatment result after resection: Rethoracotomy ‡</li> </ul>                                                                                                       |                                                                                                                     |                                                                                                                                                                           |                                                                                                                                                                                                                               |                                   |                           |
| <b>Morgans [69] 2015</b>            | Prostate Cancer         | <ul style="list-style-type: none"> <li>Cause-specific survival †</li> <li>Overall survival †</li> </ul>                                                     | <ul style="list-style-type: none"> <li>QoL § q &amp; aa</li> <li>Performance status ‡ gg</li> <li>Need for pain medication §</li> </ul>                                                                   | Not reported in the study                                                                                           | <ul style="list-style-type: none"> <li>Major systemic therapy complications ‡</li> </ul>                                                                                  | <ul style="list-style-type: none"> <li>Procedures needed for local progression ‡</li> <li>Symptomatic skeletal event ‡</li> <li>Development of metastasis ‡</li> <li>Development of Castration-Resistant Disease ‡</li> </ul> | Not reported in the study         | Not reported in the study |
| <b>Mak [70] 2016</b>                | Lung cancer             | <ul style="list-style-type: none"> <li>Overall survival †</li> <li>Treatment-related mortality ‡</li> <li>Cause of death †</li> </ul>                       | <ul style="list-style-type: none"> <li>QoL § q &amp; ff</li> <li>Performance status ‡ gg</li> <li>Quality of death † &amp; ‡</li> </ul>                                                                   | <ul style="list-style-type: none"> <li>Time from diagnosis to treatment ‡</li> </ul>                                | <ul style="list-style-type: none"> <li>Major surgical complications ‡</li> <li>Major radiation complications ‡</li> <li>Major systemic therapy complications ‡</li> </ul> | Not reported in the study                                                                                                                                                                                                     | Not reported in the study         | Not reported in the study |
| <b>Legendijk [71] 2018</b>          | Breast cancer surgeries | Not reported in the study                                                                                                                                   | <ul style="list-style-type: none"> <li>QoL § u, q, v &amp; w</li> </ul>                                                                                                                                   | Not reported in the study                                                                                           | Not reported in the study                                                                                                                                                 | Not reported in the study                                                                                                                                                                                                     | Not reported in the study         | Not reported in the study |
| <b>Javid [72] 2017</b>              | Breast Cancer           | Not reported in the study                                                                                                                                   | <ul style="list-style-type: none"> <li>QoL ( Physical function; Treatment decision-making; Body image; Emotional well-being; Sexual function) §</li> </ul>                                                | Not reported in the study                                                                                           | Not reported in the study                                                                                                                                                 | Not reported in the study                                                                                                                                                                                                     | Not reported in the study         | Not reported in the study |
| <b>Escudero-Vilaplana [73] 2020</b> | Lung cancer             | <ul style="list-style-type: none"> <li>Overall survival †</li> <li>Cause of death ‡</li> </ul>                                                              | <ul style="list-style-type: none"> <li>QoL § u &amp; hh</li> <li>Performance status ‡ gg</li> <li>Quality of death † &amp; ‡ §</li> <li>Patient productivity loss (Sick leave or disability) §</li> </ul> | <ul style="list-style-type: none"> <li>Time from diagnosis ‡</li> <li>Time from diagnosis to Treatment ‡</li> </ul> | <ul style="list-style-type: none"> <li>Major surgical complications ‡</li> <li>Major systemic therapy or/and radiotherapy complications ‡</li> </ul>                      | Not reported in the study                                                                                                                                                                                                     | Not reported in the study         | Not reported in the study |
| <b>Ong [74] 2017</b>                | Breast cancer           | <ul style="list-style-type: none"> <li>Overall survival †</li> <li>Death attributed to breast cancer †</li> <li>Recurrence-free survival (local,</li> </ul> | <ul style="list-style-type: none"> <li>QoL § q, s, v, w, x</li> </ul>                                                                                                                                     | Not reported in the study                                                                                           | <ul style="list-style-type: none"> <li>Reoperations owing to involved margins ‡ and/or §</li> <li>Severity of acute complications based on the</li> </ul>                 | Not reported in the study                                                                                                                                                                                                     | Not reported in the study         | Not reported in the study |

| Author, Year | Condition/ Disease | Survival               | Degree of Health or Recovery | Time to recovery & time to return to normal activities | Disutility of care or treatment process                              | Sustainability of health or recovery | Long-term consequences of therapy | Process Measures |
|--------------|--------------------|------------------------|------------------------------|--------------------------------------------------------|----------------------------------------------------------------------|--------------------------------------|-----------------------------------|------------------|
|              |                    | regional, or distant)‡ |                              |                                                        | Clavien-Dindo and CTCAE ‡ and/or §<br>▪ Name of acute complication ‡ |                                      |                                   |                  |

**Abbreviations:** ACE, Angiotensin-Converting Enzyme; ARB, Angiotensin Receptor Blockers; AVD, Aortic Valve Disease; AVR, Aortic Valve Replacement; CABG, Coronary Artery Bypass Grafting; CAD, Coronary Artery Disease; CT, Conservative Treatment; CTCAE, US National Cancer Institute Common Terminology Criteria for Adverse Events; cT Stage, Clinical T Stage; HRQoL, Health-Related Quality of Life; PCI, Percutaneous Coronary Intervention; QoL, Quality of Life; SAVR, Surgical Aortic Valve Replacement; TAVI, Transcatheter Aortic Valve Implantation; TAVR, Transcatheter Aortic Valve Replacement; VTE, Venous Thromboembolism.

**Data source:** † Administrative; ‡ Clinician-Reported; § Patient-Reported.

**Patient-Reported Outcome Measures Instruments:** <sup>a</sup> European Quality of Life (EQ-5D-3L); <sup>b</sup> Patient-Reported Outcomes Measurement Information System (PROMIS Global-10); <sup>c</sup> Short Form-12 (SF-12); <sup>d</sup> Veterans RAND -12 (VR-12); <sup>e</sup> Beliefs about Medicine Questionnaire (BMQ); <sup>f</sup> Hill-Bone Medication Adherence Scale; <sup>g</sup> Short Form-36 (SF-36); <sup>h</sup> simplified modified Rankin Scale questionnaire; <sup>i</sup> Patient Health Questionnaire-4 (PHQ-4); <sup>j</sup> Kansas City Cardiomyopathy Questionnaire (KCCQ); <sup>k</sup> Quality of Life Index Cardiac Version (QLI); <sup>l</sup> Quality of Life after Myocardial Infarction (QLMI); <sup>m</sup> Seattle Angina Questionnaire (SAQ-7); <sup>n</sup> Rose Dyspnea Scale; <sup>o</sup> Patient Health Questionnaire-2 (PHQ-2); <sup>p</sup> Physical Function Short Form-4a; <sup>q</sup> European Organization for Research and Treatment of Cancer-Core 30 (EORTC-C30); <sup>r</sup> European Organization for Research and Treatment of Cancer-Colorectal cancer-29 (EORTC-CR29); <sup>s</sup> European Organization for Research and Treatment of Cancer – Colorectal Liver Metastasis-21 (EORTC-LMC21); <sup>t</sup> Memorial Sloan-Kettering Cancer Center-Bowel Function Instrument (MSKCC-BFI); <sup>u</sup> European Quality of Life (EQ-5D-5L); <sup>v</sup> European Organization for Research and Treatment of Cancer-Breast 23 (EORTC-BR23); <sup>w</sup> Breast Questionnaire (Breast Q); <sup>x</sup> Functional Assessment of Cancer Therapy - Endocrine Symptoms (FACT-ES); <sup>y</sup> Reproductive Concerns Scale (RCS); <sup>z</sup> Care-related Quality of Life (CarerQoL-7D); <sup>aa</sup> Expanded Prostate Cancer Index -26 (EPIC-26); <sup>bb</sup> Service Satisfaction Scale (SSS-CC); <sup>cc</sup> Visual Function Questionnaire (VFQ-25); <sup>dd</sup> Leiden Bother and Needs Questionnaire for patients with pituitary disease (LBNQ-Pituitary); <sup>ee</sup> Functional Assessment of Cancer Therapy – Breast (FACT-B); <sup>ff</sup> European Organization for Research and Treatment of Cancer – Lung Cancer-13 (EORTC-LC 13); <sup>gg</sup> Eastern Cooperative Oncology Group Scale of Performance Status (ECOG Scale of Performance Status); <sup>hh</sup> Specific questionnaire Lung Cancer Symptom Scale (LCSS) in Spain.
